# Supplementary material for: Color-tunable and ultralong organic room temperature phosphorescence from poly(acrylic acid)-based materials through hydrogen bond engineering
Source: Royal Society of Chemistry journal article supplement (doi:10.1039/d2tc04789f), 2023-01-01
Supplement: d2tc04789f1.pdf [file d2tc04789f1.pdf]

## Supporting information

### **Color-tunable and ultralong organic room temperature phosphorescence from poly(acrylic acid)-based materials through hydrogen bond engineering**

Liuqi Kong,<sup>a</sup> Yan Zhu,<sup>a</sup> Shaochen Sun,<sup>a</sup> Hongye Li,<sup>a</sup> Farong Tao,<sup>\*a</sup> Fei Li,<sup>b</sup> Liping Wang<sup>a</sup> and Guang Li<sup>\*a</sup>

<sup>a</sup>*School of Materials Science and Engineering, Liaocheng University, Liaocheng 252059, China.*

<sup>b</sup>*College of Chemistry, Chemical Engineering and Materials Science, Shandong Normal University, Jinan 250014, China.*

E-mail: taofarong@lcu.edu.cn; lglzsd@126.com

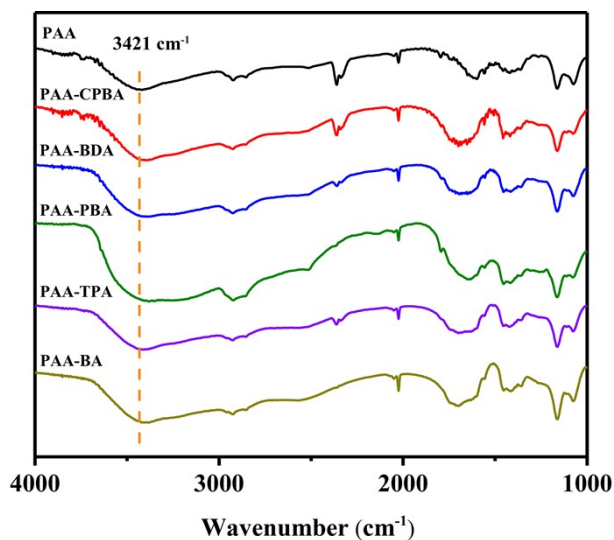

**Fig. S1** FTIR spectra of PAA and PAA-based RTP materials with 1000:15 molar ratio of AA to the doped phosphors.

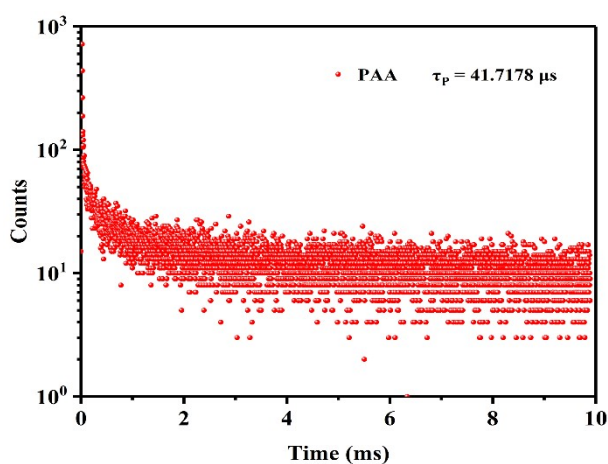

**Fig. S2** Time-resolved emission decay curve of PAA with an excitation wavelength of 245 nm.

**Table S1.** Phosphorescence lifetime ( $\tau$ ) of PAA-CPBA, PAA-BDA, PAA-BA and PAA-TPA under ambient conditions.<sup>a</sup>

| Complex  | $\lambda_{em}$ (nm) | $\tau_1$ (ms) | $A_1$ (%) | $\tau_2$ (ms) | $A_2$ (%) | $\tau_3$ (ms) | $A_3$ (%) |
|----------|---------------------|---------------|-----------|---------------|-----------|---------------|-----------|
| PAA-CPBA | 425                 | 21.1          | 3.57      | 218.7         | 39.53     | 789.1         | 56.91     |
| PAA-BDA  | 430                 | 1.7           | 2.15      | 29.8          | 23.40     | 161.0         | 74.45     |
| PAA-BA   | 417                 | 6.0           | 13.13     | 42.9          | 45.60     | 185.8         | 41.27     |
| PAA-TPA  | 450                 | 6.1           | 15.15     | 38.0          | 37.91     | 224.7         | 46.95     |
| PAA-PBA  | 500                 | 9.7           | 21.12     | 79.8          | 78.88     | -             | -         |

<sup>a</sup> Determined from the fitting function of  $I(t) = A_1e^{-t/\tau_1} + A_2e^{-t/\tau_2} + A_3e^{-t/\tau_3}$  according to the time-resolved emission decay curves.

**Table S2.** Phosphorescence lifetime ( $\tau$ ) of PAA-CPBA with different molar ratios of AA to CPBA under ambient conditions.<sup>a</sup>

| Molar ratio | $\lambda_{em}$<br>(nm) | $\tau_1$<br>(ms) | $A_1$<br>(%) | $\tau_2$<br>(ms) | $A_2$<br>(%) | $\tau_3$<br>(ms) | $A_3$<br>(%) |
|-------------|------------------------|------------------|--------------|------------------|--------------|------------------|--------------|
| 1000:1      | 425                    | 34.1             | 8.01         | 205.3            | 49.85        | 717.8            | 42.14        |
| 1000:5      | 425                    | 47.3             | 9.94         | 246.1            | 48.62        | 860.6            | 41.44        |
| 1000:10     | 425                    | 37.1             | 7.67         | 227.3            | 45.56        | 859.6            | 46.77        |
| 1000:15     | 425                    | 21.1             | 3.57         | 218.7            | 39.53        | 789.1            | 56.91        |
| 1000:20     | 425                    | 36.3             | 7.62         | 216.0            | 46.72        | 799.1            | 45.66        |
| 1000:25     | 425                    | 40.1             | 8.84         | 232.7            | 48.33        | 815.5            | 42.83        |

<sup>a</sup> Determined from the fitting function of  $I(t) = A_1e^{-t/\tau_1} + A_2e^{-t/\tau_2} + A_3e^{-t/\tau_3}$  according to the time-resolved emission decay curves.

**Table S3.** Photoluminescence and phosphorescence quantum yields of PAA-CPBA with different molar ratios of AA to CPBA under ambient conditions.

| Molar ratio | $\Phi_{PL}$ (%) | $\Phi_{Phos}$ (%) |
|-------------|-----------------|-------------------|
| 1000:1      | 8.39            | 4.49              |
| 1000:5      | 8.73            | 4.39              |
| 1000:10     | 8.83            | 4.65              |
| 1000:15     | 9.34            | 5.43              |
| 1000:20     | 7.68            | 4.27              |
| 1000:25     | 7.84            | 4.66              |

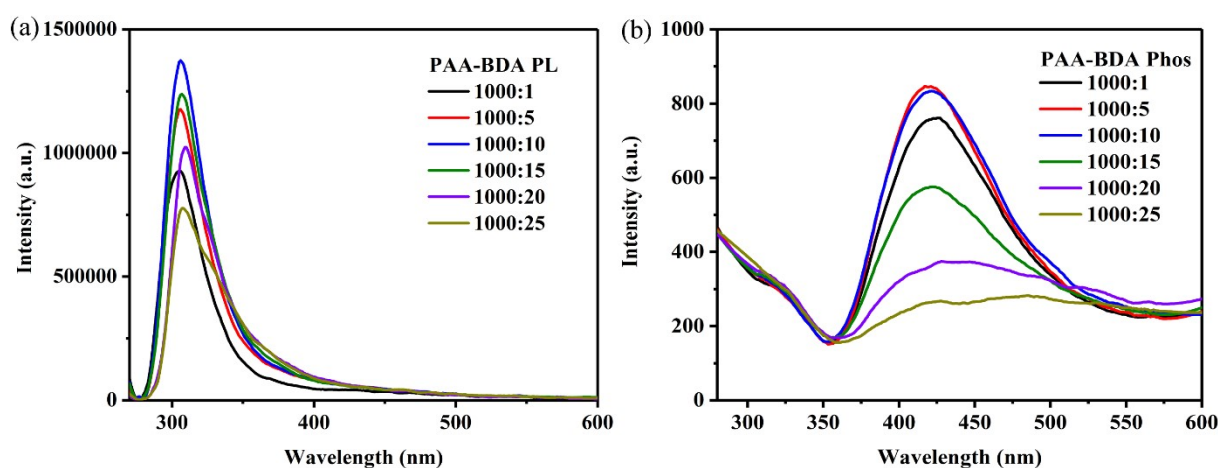

**Fig. S3** (a) Steady state PL spectra of PAA-BDA with different molar ratios ( $\lambda_{ex} = 240$  nm). (b) Phosphorescence spectra of PAA-BDA with different molar ratios ( $\lambda_{ex} = 240$  nm).

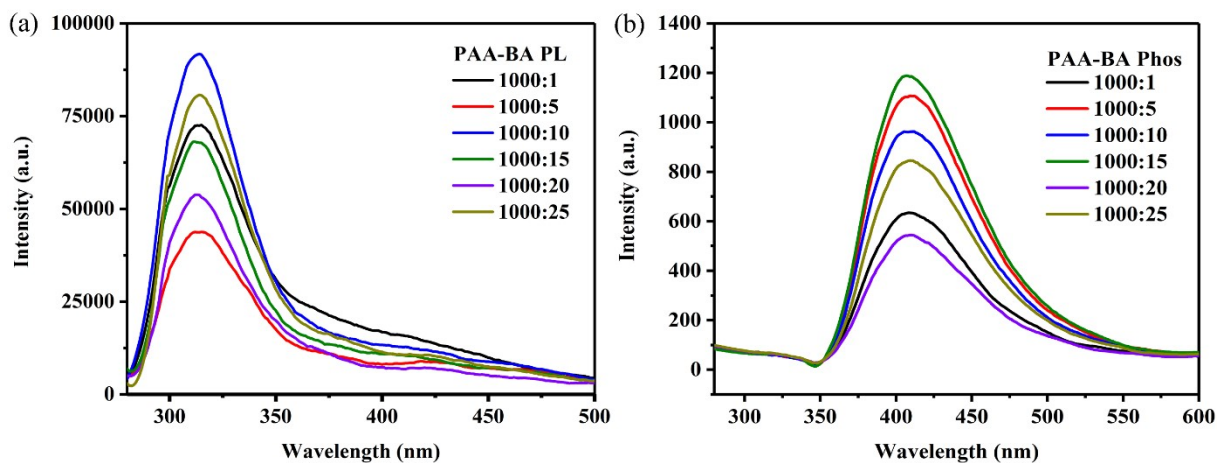

**Fig. S4** (a) Steady state PL and spectra of PAA-BA with different molar ratios ( $\lambda_{\text{ex}} = 245$  nm). (b) Phosphorescence spectra of PAA-BA with different molar ratios ( $\lambda_{\text{ex}} = 245$  nm).

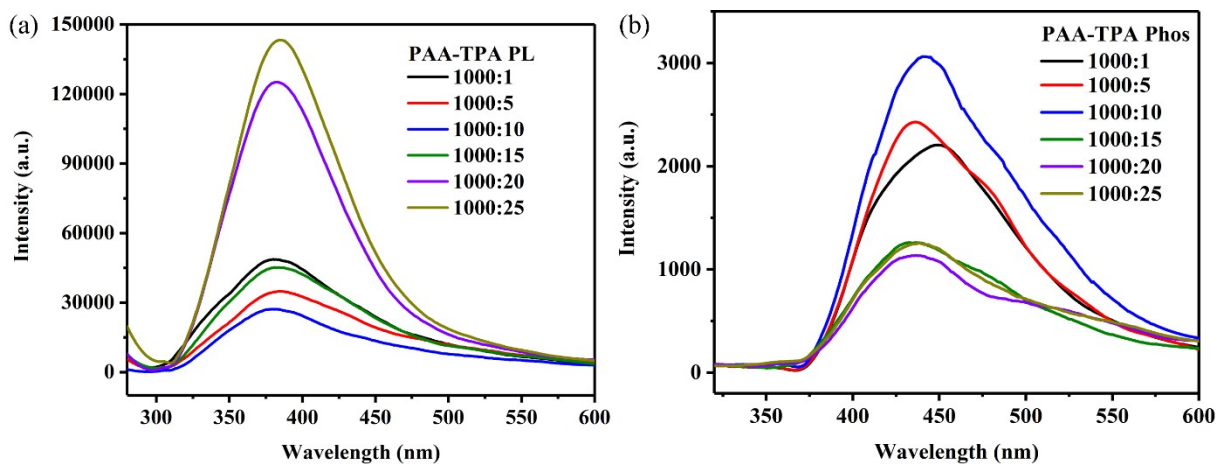

**Fig. S5** (a) Steady state PL spectra of PAA-TPA with different molar ratios ( $\lambda_{\text{ex}} = 268$  nm). (b) Phosphorescence spectra of PAA-TPA with different molar ratios ( $\lambda_{\text{ex}} = 245$  nm).

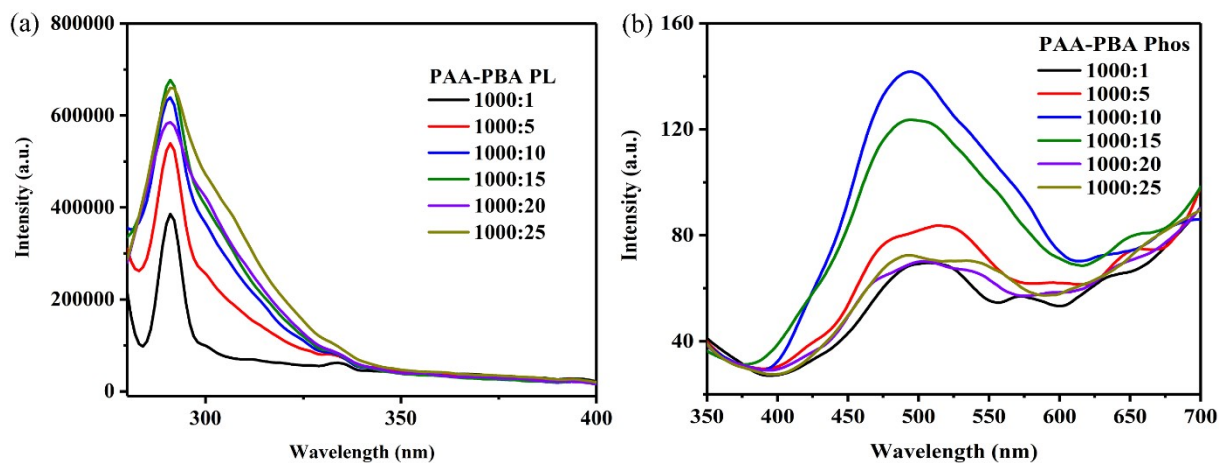

**Fig. S6** (a) Steady state PL spectra of PAA-PBA with different molar ratios ( $\lambda_{\text{ex}} = 278$  nm). (b) Phosphorescence spectra of PAA-PBA with different molar ratios ( $\lambda_{\text{ex}} = 295$  nm).

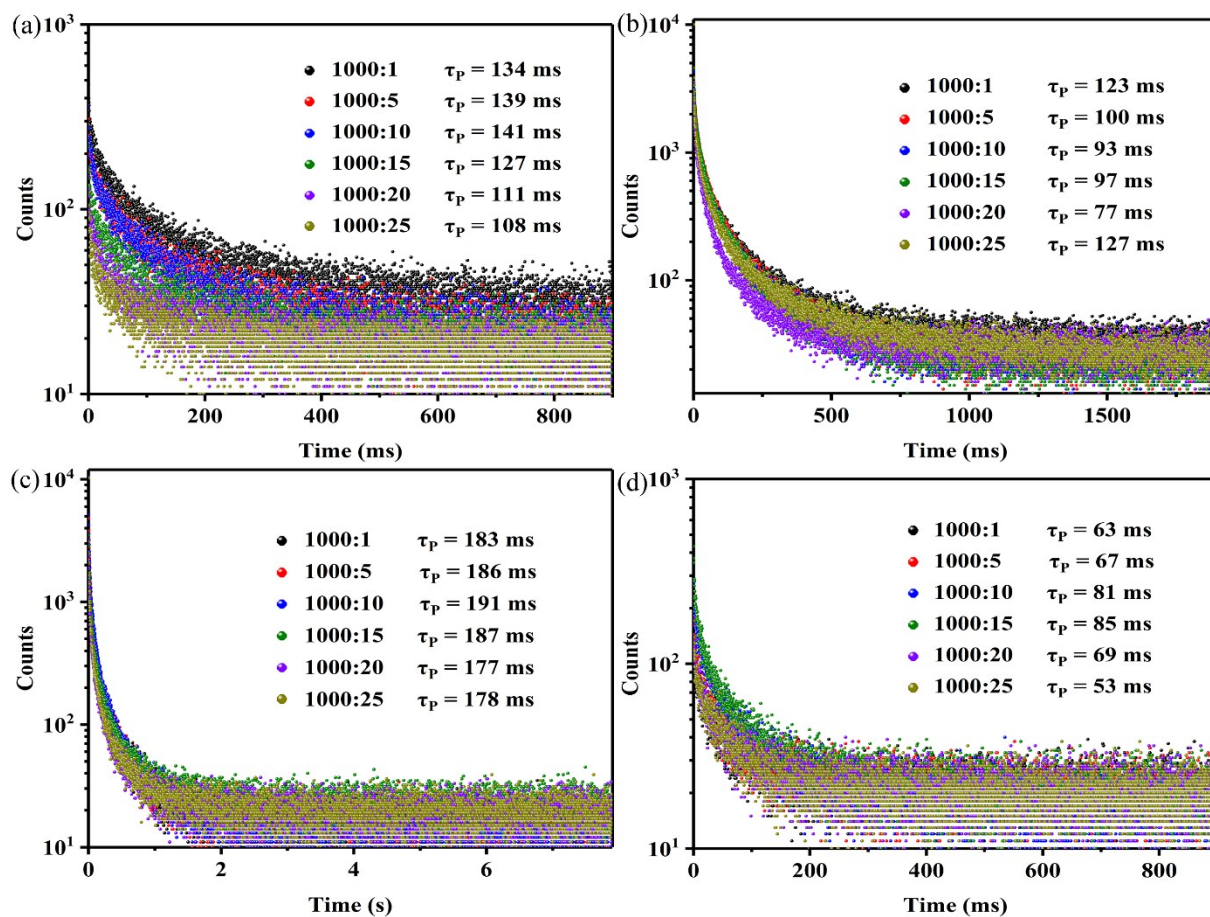

**Fig. S7** Time-resolved emission decay curves of PAA-BDA at 420 nm (a), PAA-BA at 417 nm (b), PAA-TPA at 450 nm (c), and PAA-PBA at 500 nm (d) with different molar ratios under ambient conditions.

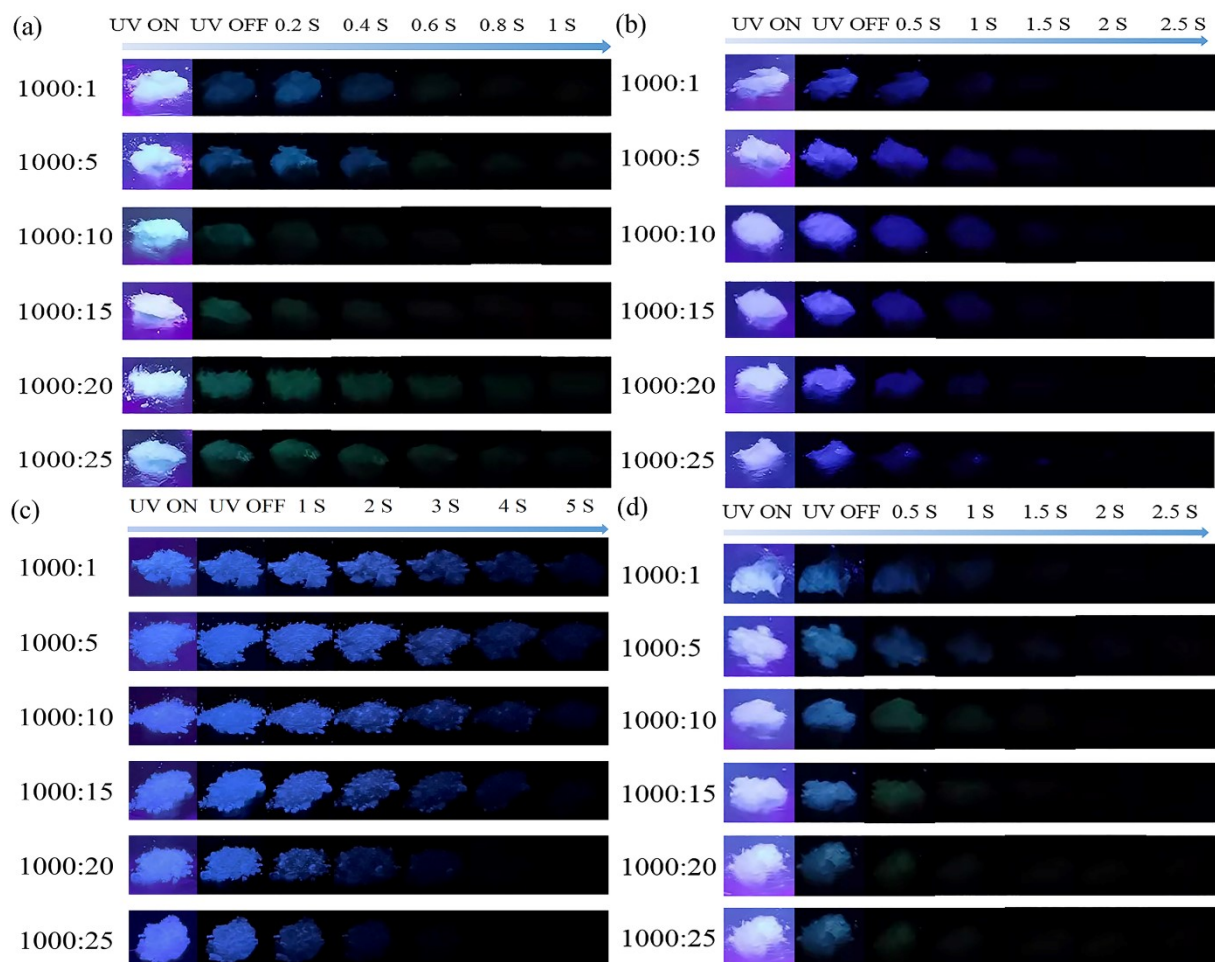

**Fig. S8** Photographs of PAA-BDA (a), PAA-BA (b), PAA-TPA (c) and PAA-PBA (d) under 254 nm UV lights and after ceasing the irradiation under ambient conditions.

**Table S4.** Phosphorescence lifetimes of PAA-CPBA with molar ratio of 1000:15 (AA/CPBA) in air, nitrogen and argon atmospheres.<sup>a</sup>

| Atmosphere | $\tau_1$<br>(ms) | $A_1$<br>(%) | $\tau_2$<br>(ms) | $A_2$<br>(%) | $\tau_3$<br>(ms) | $A_3$<br>(%) |
|------------|------------------|--------------|------------------|--------------|------------------|--------------|
| Air        | 21.1             | 3.57         | 218.7            | 39.53        | 789.1            | 56.91        |
| Nitrogen   | 44.6             | 5.42         | 301.4            | 43.90        | 981.1            | 50.67        |
| Argon      | 78.0             | 5.16         | 497.3            | 40.55        | 1373.6           | 54.29        |

<sup>a</sup> Determined from the fitting function of  $I(t) = A_1e^{-t/\tau_1} + A_2e^{-t/\tau_2} + A_3e^{-t/\tau_3}$  according to the time-resolved emission decay curves.

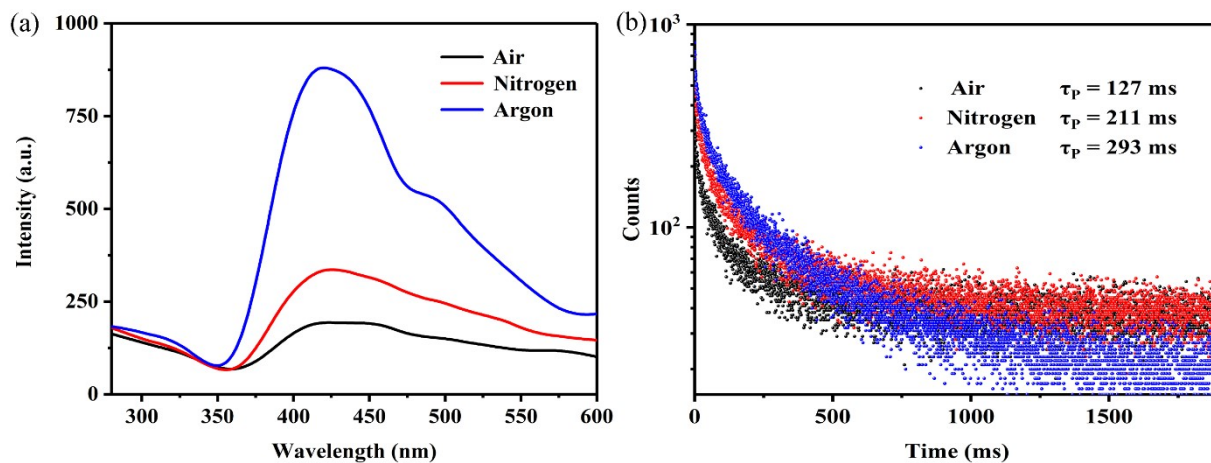

**Fig. S9** (a) Phosphorescence spectra of PAA-BDA with AA/BDA molar ratio of 1000:15 in air, nitrogen and argon atmospheres. (b) Time-resolved emission decay curves of PAA-BDA with AA/BDA molar ratio of 1000:15 in air, nitrogen and argon atmospheres.

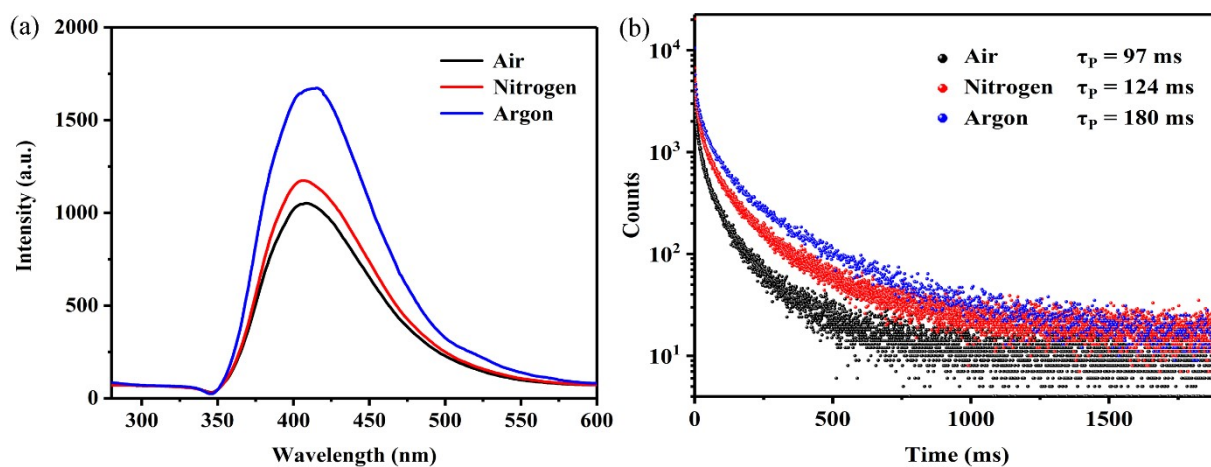

**Fig. S10** (a) Phosphorescence spectra of PAA-BA with AA/BA molar ratio of 1000:15 in air, nitrogen and argon atmospheres. (b) Time-resolved emission decay curves of PAA-BA with AA/BA molar ratio of 1000:15 in air, nitrogen and argon atmospheres.

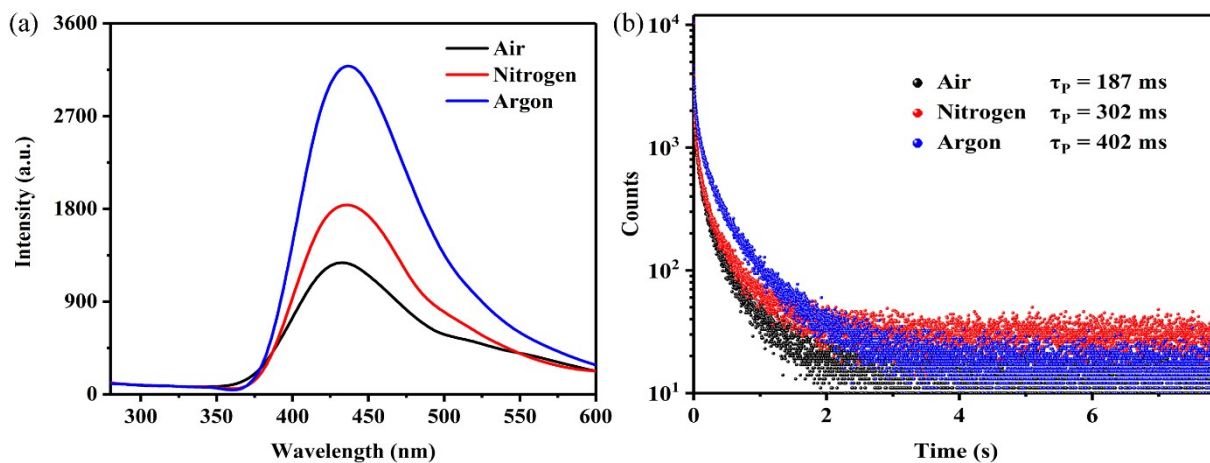

**Fig. S11** (a) Phosphorescence spectra of PAA-TPA with AA/TPA molar ratio of 1000:15 in air nitrogen and argon atmospheres. (b) Time-resolved emission decay curves of PAA-TPA with AA/TPA molar ratio of 1000:15 in air, nitrogen and argon atmospheres.

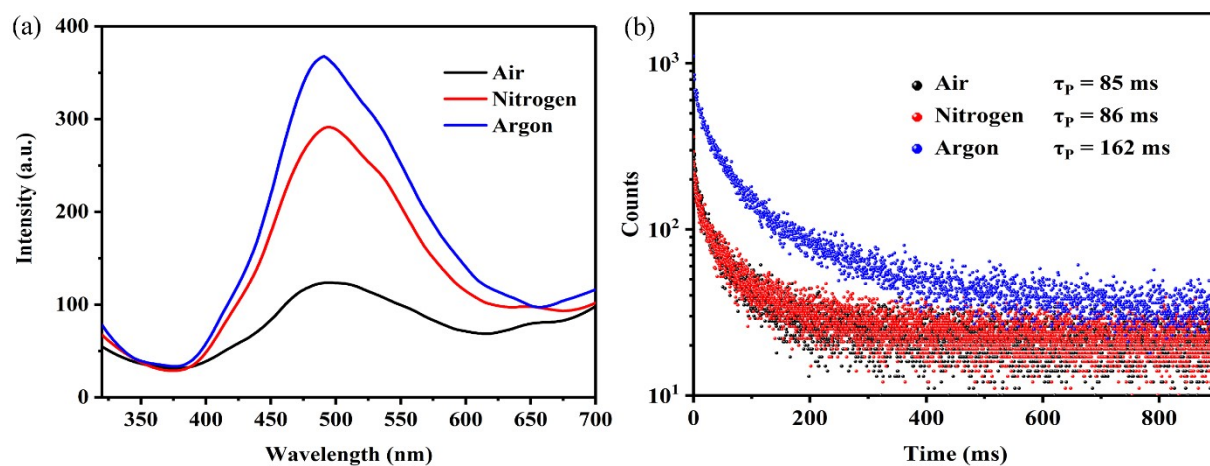

**Figure S12** (a) Phosphorescence spectra of PAA-PBA with AA/PBA molar ratio of 1000:15 in air, nitrogen and argon atmospheres. (b) Time-resolved emission decay curves of PAA-PBA with AA/PBA molar ratio of 1000:15 in air, nitrogen and argon atmospheres.



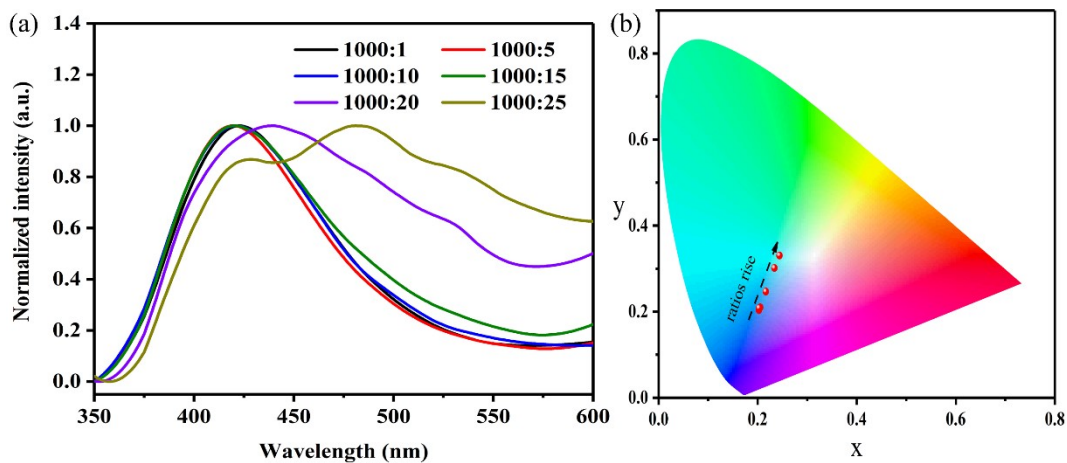

**Fig. S13** (a) The normalized phosphorescence spectra of PAA-BDA with different molar ratios of AA to BDA. (b) CIE coordinate diagram for PAA-BDA with different molar ratios of AA to BDA.

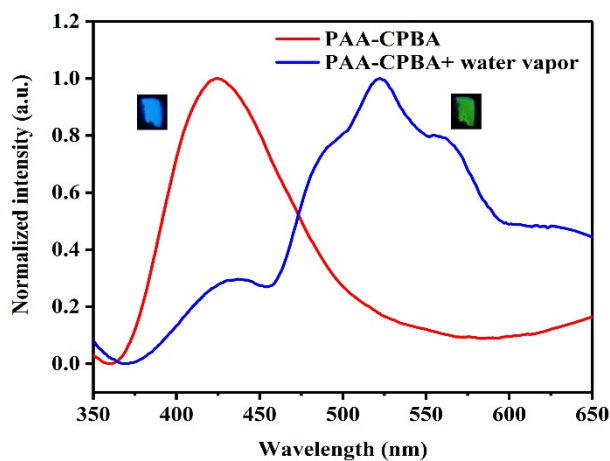

**Fig. S14** The normalized phosphorescence emission spectra of PAA-CPBA before and after water vapor fumigation.

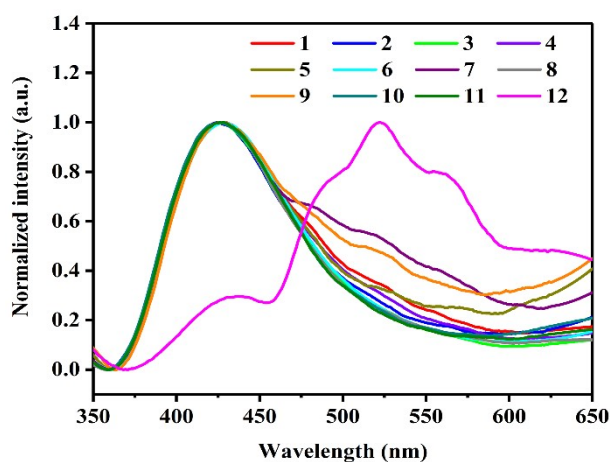

**Fig. S15** The normalized phosphorescence spectra of PAA-CPBA after the fumigation of different solvents under 245 nm excitation. (1-acetone, 2-acetonitrile, 3-dichloromethane, 4-diethyl ether, 5-dimethylsulfoxide, 6-ethyl acetate, 7-ethanol, 8-methanol, 9-N, N dimethylformamide, 10-petroleum ether, 11-Tetrahydrofuran, 12-Water).

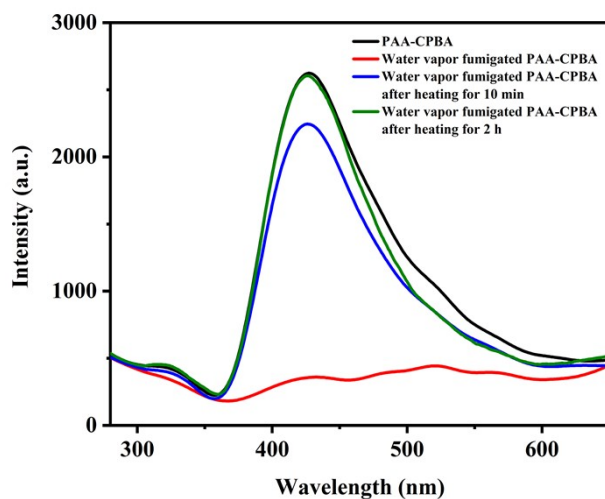

**Fig. S16** Phosphorescence spectra of PAA-CPBA, water vapor fumigated PAA-CPBA and water vapor fumigated PAA-CPBA after heating for 10 min and 2 h.

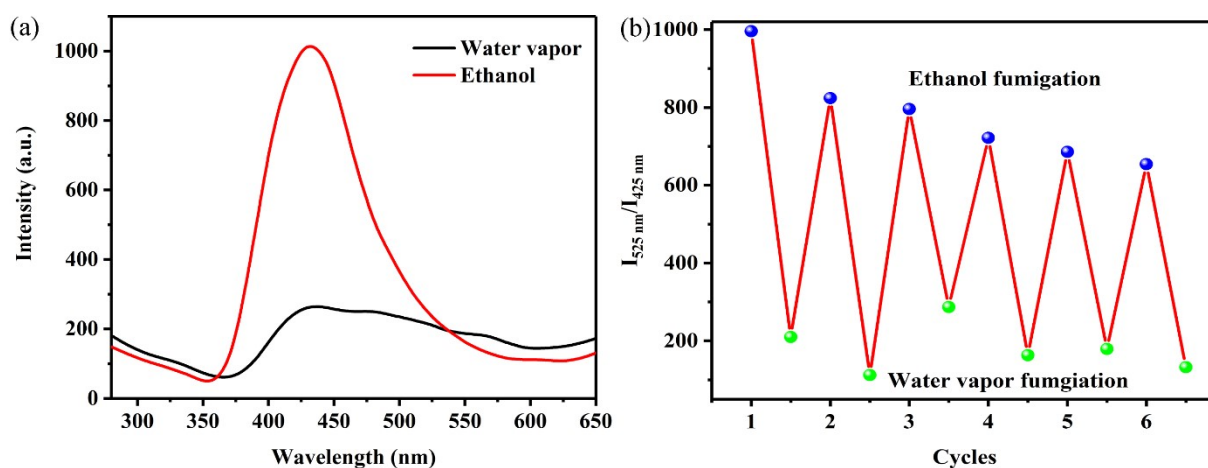

**Fig. S17** (a) Phosphorescence spectra of PAA-CPBA with water vapor and ethanol fumigation. (b) The reversible transformation of phosphorescence emission intensity of PAA-CPBA at 525 nm and 425 nm after alternate treatment of water vapor and ethanol fumigation.
